# Supplementary material for: Amorphous NixCoyP-supported TiO2 nanotube arrays as an efficient hydrogen evolution reaction electrocatalyst in acidic solution
Source: publisher site journal article supplement (doi:10.3762/bjnano.10.6), 2019-01-07
Supplement: Additional file 1 [file 2190-4286-10-6-S1.pdf]

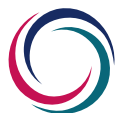

## Supporting Information

for

### **Amorphous Ni<sub>x</sub>Co<sub>y</sub>P-supported TiO<sub>2</sub> nanotube arrays as an efficient hydrogen evolution reaction electrocatalyst in acidic solution**

Yong Li, Peng Yang, Bin Wang and Zhongqing Liu

*Beilstein J. Nanotechnol.* **2019**, *10*, 62–70. [doi:10.3762/bjnano.10.6](https://doi.org/10.3762/bjnano.10.6)

### **Comparison of the overpotentials (vs RHE) between the references and this work**

**Table S1:** Comparison of the overpotentials (vs RHE) between the references and this work.

| Catalyst                             | Substrate   | Electrolyte                              | $\eta_0$<br>(mV) | $\eta_{10}$<br>(mV) | $\eta_{20}$<br>(mV) | $\eta_{100}$<br>(mV) | Tafel slope<br>(mV·dec <sup>-1</sup> ) | Reference        |
|--------------------------------------|-------------|------------------------------------------|------------------|---------------------|---------------------|----------------------|----------------------------------------|------------------|
| Ni-Co-P                              | NF          | 1 M KOH                                  |                  | 107                 | 125                 |                      | 62                                     | [1]              |
| NiCoP@Cu <sub>3</sub> P              | CF          | 1 M KOH                                  |                  | 54                  |                     |                      | 73                                     | [2]              |
| HWS NiCoP                            | NF          | 1 M KOH                                  |                  | 59                  |                     | 220                  | 90                                     | [3]              |
| NiCoP                                | CNT/NF      | 1 M KOH                                  | 69               | 80                  |                     | 173                  | 62                                     | [4]              |
| Ni <sub>2-x</sub> Co <sub>x</sub> P  | RGO         | 0.5 M H <sub>2</sub> SO <sub>4</sub>     | 31               | 42                  | 55                  |                      | 45.2                                   | [5]              |
| NiCoP NPs                            |             | 0.5 M H <sub>2</sub> SO <sub>4</sub>     | 42               | 97                  |                     | 158                  | 52                                     | [6]              |
| Nest-like NiCoP                      | CC          | 0.5 M H <sub>2</sub> SO <sub>4</sub>     |                  | 48                  |                     | 137                  | 38.5                                   | [7]              |
|                                      |             | 1 M KOH                                  |                  | 62                  |                     | 158                  | 68.2                                   |                  |
| H-NiCoP                              | NF          | 1 M KOH                                  |                  | 44                  |                     |                      | 38.6                                   | [8]              |
| NiCoP                                | NF          | 1 M KOH                                  |                  | 32                  |                     |                      | 37                                     | [9]              |
| <b>Ni<sub>x</sub>Co<sub>y</sub>P</b> | <b>TNAs</b> | <b>0.5 M H<sub>2</sub>SO<sub>4</sub></b> | <b>65</b>        | <b>209</b>          | <b>257</b>          |                      | <b>46.6</b>                            | <b>this work</b> |

## References

- [1] Yang,Q.P.; Lv, C.C.; Huang,Z.P.; Zhang.C. *Int. J. Hydrogen Energy* **2018**, *43*, 7872–7880.
- [2] Ma, X.;Chang, Y.; Zhang, Z.; Tang, J. *J Mater. Chem. A* **2018**,*6*,2100–2106.
- [3] Cai, Cai, Z.C.; Wu, A.P.; Yan,H.J.;Xiao, Y.L.; Chen,C.F.;Tian,C.G.; Wang,L.; Wang,R.H.; Fu, H.G. *Nanoscale* **2018**, *10*, 7619–7629
- [4] Wu. J.;Ge, X.; Li, Z.; Cao, D.; Xiao, J. *Electrochemia Acta* **2017**, *252*, 101–108.
- [5] Li, J.; Yan, M.;Zhou, X.; Huang Z.Q.; Xia, Z.; Chang, C.R.; Ma,Y.Y. *Adv. Funct. Mater.* **2016**, *26*, 6785–6796.
- [6] Wang, C.; Jiang, J.; Ding, T.; Chen, G.;Xu, W.;Yang, Q. *Adv. Mater. Interfaces* 2016,*3*,1500454.
- [7] Du, C.;Yang, L.; Yang,F.; Cheng, G.; Luo, W. *ACS Catal.* **2017**,*7*,4131–4137.
- [8] Liu, C.; Zhang, G.; Yu, L.; Qu, J.; Liu, H. *Small* **2018**, *14*,1800421.
- [9] Li, Y.; Liu, J.; Chen, C.; Zhang, X.; Chen, J. *ACS Appl. Mater. Interf.* 2017, *9*,5982–5991.
